# Supplementary material for: Water-induced efficient isomerization of glucose into fructose over the lithium loaded silicalite-1 catalyst at 50 °C
Source: Royal Society of Chemistry journal article supplement (doi:10.1039/d3gc00638g), 2023-01-01
Supplement: d3gc00638g1.pdf [file d3gc00638g1.pdf]

## Water-Induced Efficient Isomerization of Glucose into Fructose over the Lithium Loaded Silicalite-1 Catalyst at 50 °C

Yanfei Zhang<sup>a,b,&</sup>, Wang Liu<sup>a,b,&</sup>, Xinpeng Zhao<sup>a,b</sup>, Gai Miao<sup>a</sup>, Mengya Sun<sup>a,b</sup>, Xinqing Chen<sup>a,b,\*</sup>, Hu Luo<sup>a,\*</sup>, Shenggang Li<sup>a,b</sup>, Lingzhao Kong<sup>a,b,c,\*</sup>

<sup>a</sup> CAS Key Laboratory of Low-Carbon Conversion Science and Engineering, Shanghai Advanced Research Institute, Chinese Academy of Sciences, Shanghai 201210 (P.R. China)

<sup>b</sup> University of Chinese Academy of Sciences, Beijing 100049 (P.R. China)

<sup>c</sup> School of Environmental Science and Engineering, Suzhou University of Science and Technology, Suzhou, Jiangsu, 215009, P.R. China.

& These two authors contribute equally

\*Corresponding authors: (chenxq@sari.ac.cn, luoh@sari.ac.cn, konglz@sari.ac.cn)

## General Information

All chemicals were used as received from the commercial suppliers: mannose ( $\geq 99\%$ ), fructose ( $\geq 99\%$ ), LiCl (AR,  $\geq 99.0\%$ ), glucose (AR,  $99.0\%$ ), lactic acid (AR,  $\geq 99\%$ ), formic acid (AR,  $\geq 99\%$ ). All reactions were performed in a 100.0 mL Parr pressure reactor. Centrifugation of the reaction mixture was performed on Thermo LYNX6000 (3000 rpm, 10 min).

Carbon-13 Nuclear Magnetic Resonance Spectrometry ( $^{13}\text{C}$  NMR): Agilent 500 MHz (125MHz), The product was dissolved in  $\text{D}_2\text{O}$  and scanned 1024 times.

X-Ray powder diffraction (XRD) patterns of the catalysts were performed on Rigaku Ultima IVX-Ray diffractometer using Cu K $\alpha$  radiation in the  $2\theta$  range from  $5^\circ$  to  $80^\circ$  at a scan rate of  $2^\circ/\text{min}$ .

Scanning electron microscope (SEM) analysis: The Supra 55 Sapphire field emission scanning electron microscope of Carl Zeiss (shanghai) Co was used to analyze the morphology of the catalyst. The test voltage was 15 KV, catalyst powder needed to be taken for gold spraying before the test.

Pyridine adsorption Fourier-transform infrared (Py-IR): The catalyst was detected by the FT-IR Nicolet 670. Weigh out 0.05 g of catalyst, press it into a translucent sheet in a tablet press, and place it in the sample tank (the material of the sample tank and the window is quartz). The sample tank was evacuated and treated at  $200^\circ\text{C}$  for 2 h, after which the temperature was lowered to room temperature and the sample background spectrum was measured. Firstly, the pyridine gas is introduced into the sample tank to absorb the saturation of the sample. Raise the sample temperature to  $200^\circ\text{C}$  and hold it for 1 h to measure the spectrum at  $200^\circ\text{C}$ . After that, the temperature was increased to  $350^\circ\text{C}$  for 1 h, and infrared spectra of pyridine adsorption at  $200^\circ\text{C}$  and  $350^\circ\text{C}$  were obtained.

Analysis of specific surface area of nitrogen adsorption (BET): Micromeritics, TriStar II 3020, The sample to be tested is first degassed at  $300^\circ\text{C}$  for more than 3 h, and then tested with  $\text{N}_2$  as the medium at  $-196^\circ\text{C}$ .

Inductively coupled plasma-atomic emission spectrometry (ICP): Perkin Elmer Optima 8000, digest and filter a certain amount of catalyst to measure the content of Li.

UV Vis absorption spectrum: Agilent Spectrophotometer technologies Cary 5000 UV vis-NIR, measuring wavelength range: 200-500 nm.

Total Organic Carbon (TOC): Shimadzu TOC-LCSH/CPH, Liquid products need to be diluted, range :  $4\ \mu\text{g/L}\sim 30000\ \text{mg/L}$ . According to the TOC results, the carbon balance was  $>99.9\%$  when Li-S1 as the catalyst in  $50^\circ\text{C}$ .

The data were recorded on the HPLC (Shimadzu LC-20A, Aminex HPX-87H Ion Exclusion Column: 300 mm × 7.8 mm. RID-10A). Analysis condition: column temperature 50 °C, injection volume 10 μL, the mobile phase 12.5 mmol/L H<sub>2</sub>SO<sub>4</sub>, 0.60 ml/min. After reaction, the solids were separated by filtration and the composition of the liquid phase was analyzed by HPLC. Besides the main product fructose and glucose, a variety of other compounds were detected in more than 80 °C, which were comprehensively analyzed. By drawing a standard working curve with the standard product of the specific component to be tested, and then measuring the content of the component in the sample under the exact same chromatographic conditions, the concentration can be found from the working curve. Conversion and yield values were calculated based on the equations shown in the quantification part.

### Recycling Test

After a typical catalytic run (300 mg Li/S-1 catalyst, 30 ml water, 50 °C, 1 h, 1 MPa N<sub>2</sub>), the catalyst was separated from the reaction solution by centrifugation and subsequent decantation. The solid was additionally washed with water (5\*30 ml) and dried overnight at room temperature under vacuum prior to the next run.

### Preparation of Li/S-1 catalyst

**S-1 zeolite preparing:** Accurately weigh 23.5 g TEOS, 36.7 g TPAOH (25 %) and 33.9 g H<sub>2</sub>O mix well. Stir while reacting at room temperature for 6 h. After the reaction, transfer it to the crystallizing kettle, and put it into the oven at 170 °C for 3 days. After taking it out, it was washed and centrifuged, dried and baked at 550 °C for 3 h.

**Li/S-1 catalyst preparing:** Take 2.0 g S-1 zeolite and 0.12 g LiCl into bowl and carefully grind for 30 min, then put the mixture into muffle furnace and baked at 550 °C for 3 h.

### Quantification

The yield of products was calculated based on the number of carbons in the product as follows: where  $n$  represents the number of carbons and  $C_i$  is the molar concentration of the compound  $i$ ,  $C_{\text{glucose}}$  indicates molar concentration of glucose before the reaction.

$$\text{Yield } / \% = (C_i / C_{\text{glucose}}) \times 100 \%$$

Conversion was based on the molar carbon concentration of the compounds according to the equations below, where  $C_{\text{glucose}}$  indicates the molar carbon concentration of glucose before the reaction and  $C_{\text{glucose}}'$  indicates the molar carbon concentration of glucose after the reaction.

$$\text{Conversion } / \% = (C_{\text{glucose}} - C_{\text{glucose}}') / C_{\text{glucose}} \times 100 \%$$

Selectivity was based on the molar carbon concentration of the compounds according to the equations below, where  $C_{\text{glucose}}$  indicates the molar carbon concentration of glucose before the reaction and  $C_{\text{glucose}'}$  indicates the molar carbon concentration of glucose after the reaction.  $C_{\text{fructose}}$  indicates molar carbon concentration of fructose.

$$\text{Selectivity } / \% = C_{\text{fructose}} / (C_{\text{glucose}} - C_{\text{glucose}'}) \times 100 \%$$

### **Conversion of glucose into fructose**

In a typical experiment, the catalyst (300 mg unless otherwise stated) and 300 mg glucose were placed in an intermittent high-pressure reactor (100 mL), and deionized water (30 mL) were added. The reactor was sealed and placed in a heating sleeve at the desired temperature. After the indicated reaction time, the reactor was cooled down with an ice-water bath and subsequently carefully opened.

**Table S1** Glucose isomerization catalyzed by heterogeneous catalysts in water.

| Catalysts                                                                                           | Temperature (°C) | Time (min) | Yield (%)   | Selectivity (%) | Ref.            |
|-----------------------------------------------------------------------------------------------------|------------------|------------|-------------|-----------------|-----------------|
| MgO-ZrO <sub>2</sub>                                                                                | 95               | 360        | 35.7        | 70.0            | [1]             |
| CaO-ZrO <sub>2</sub>                                                                                | 140              | 15         | 21.6        | 86.4            | [2]             |
| Fe <sub>3</sub> O <sub>4</sub> @SiO <sub>2</sub> -TMG                                               | 120              | 60         | 25          | 54.3            | [3]             |
| ZrC                                                                                                 | 120              | 20         | 34          | 75.5            | [4]             |
| Hybrid tin-silicate                                                                                 | 110              | 120        | 16.7        | 72.6            | [5]             |
| Na <sub>9</sub> Si <sub>12</sub> Ti <sub>5</sub> O <sub>38</sub> (OH)                               | 100              | 120        | 39          | 84.8            | [6]             |
| Na <sub>3</sub> (Na,H)Ti <sub>2</sub> O <sub>2</sub> [Si <sub>2</sub> O <sub>6</sub> ] <sup>2</sup> | 100              | 120        | 34          | 63.6            | [6]             |
| HKCa <sub>2</sub> Si <sub>8</sub> O <sub>19</sub>                                                   | 100              | 120        | 34          | 64.2            | [6]             |
| CaSi <sub>6</sub> O <sub>17</sub>                                                                   | 100              | 120        | 35          | 68.6            | [6]             |
| DHT-4A2                                                                                             | 90               | 9          | 9.6         | 96.0            | [7]             |
| Mg-Al-HT                                                                                            | 110              | 30         | 30          | 88.2            | [8]             |
| Sn-Beta                                                                                             | 110              | 30         | 31          | 57.4            | [9]             |
| Ti-Beta                                                                                             | 140              | 90         | 23          | 46.0            | [9]             |
| Sn-MCM-41                                                                                           | 140              | 90         | 12          | 92.3            | [9]             |
| MgNaY                                                                                               | 100              | 30         | 31          | 86.1            | [10]            |
| Sn-MFI                                                                                              | 80               | 120        | 27          | 73.0            | [11]            |
| MgO-NaY                                                                                             | 100              | 100        | 33.8        | 67.6            | [12]            |
| Mg-Al-HT/C                                                                                          | 90               | 120        | 40          | 76.0            | [12]            |
| Mg-C <sub>3</sub> N <sub>4</sub>                                                                    | 80               | 240        | 32.5        | 84.0            | [13]            |
| Ca-C <sub>3</sub> N <sub>4</sub>                                                                    | 90               | 240        | 28.4        | 87.9            | [13]            |
| K-C <sub>3</sub> N <sub>4</sub>                                                                     | 90               | 60         | 28.7        | 81.9            | [13]            |
| Na-C <sub>3</sub> N <sub>4</sub>                                                                    | 90               | 240        | 23.2        | 86.0            | [13]            |
| 5Nb@UIO-66                                                                                          | 120              | 420        | 43.1        | 61.7            | [14]            |
| CS/Ab                                                                                               | 90               | 30         | 38.9        | 85.4            | [15]            |
| Al/HC180-300/O                                                                                      | 180              | 5          | 42.6        | 83.6            | [16]            |
| <b>Li/S-1</b>                                                                                       | <b>50</b>        | <b>60</b>  | <b>40.7</b> | <b>99.9</b>     | <b>Our work</b> |

**Table S2.** ICP results of Li content in catalysts.

| Catalysts  | Li % (Theoretical loading) | Li % (After washing) | Li % (After reaction) |
|------------|----------------------------|----------------------|-----------------------|
| S-1        | 0                          | 0                    | 0                     |
| 0.5 Li/S-1 | 0.5wt%                     | 0.46wt%              | 0.47wt%               |
| 1 Li/S-1   | 1.0wt%                     | 0.78wt%              | 0.77wt%               |
| 2 Li/S-1   | 2.0wt%                     | 0.89wt%              | 0.93wt%               |

**Table S3.** BET analysis of Li/S-1 catalysts

| Catalysts  | BET surface/m <sup>2</sup> •g | Pore width/nm |
|------------|-------------------------------|---------------|
| S-1        | 359.1501                      | 3.03991       |
| 0.5 Li/S-1 | 301.8382                      | 3.32120       |
| 1 Li/S-1   | 289.9329                      | 3.28832       |
| 2 Li/S-1   | 292.6884                      | 3.10826       |

**Table S4.** Py-IR analysis of S-1 zeolite and Li/S-1 catalyst

|                 | Temperature (°C) | Weight (mg) | Brønsted acid concentration (umol/g) | Lewis acid concentration (umol/g) | Total*   | B/L*     |
|-----------------|------------------|-------------|--------------------------------------|-----------------------------------|----------|----------|
| S-1 zeolite     | 200              | 17.2        | 2.401372                             | 18.52171                          | 20.92308 | 0.129652 |
|                 | 350              | 17.2        | 0.831244                             | 0.767378                          | 1.598622 | 1.083227 |
| Li/S-1 catalyst | 200              | 17.6        | 0.496438                             | 22.97536                          | 23.4718  | 0.021607 |
|                 | 350              | 17.6        | 0.180523                             | 1.363523                          | 1.544045 | 0.132394 |

Total\*: Total acid content in catalyst, The Li loading is 1 wt% in all experiments.

B/L\*: The mass ratios of Brønsted acid: Lewis acid



**Table S5.** The glucose conversion in different solvent.

|   | Solvent                 | Conversion % | Yield % | Selectivity % |
|---|-------------------------|--------------|---------|---------------|
| 1 | H <sub>2</sub> O        | 40.7         | 40.70   | 99.9          |
| 2 | Methanol                | 8.6          | 8.6     | 99.9          |
| 3 | Ethanol                 | 7.3          | 7.3     | 99.9          |
| 4 | Glycerol                | ~0           | -       | -             |
| 5 | $\gamma$ -Valerolactone | ~0           | -       | -             |

Reaction condition: 1 h, 1 MPa N<sub>2</sub>, 300 mg glucose, 300 mg catalyst, 30 mL H<sub>2</sub>O and 50 °C. The

Li loading is 1 wt% in all experiments.

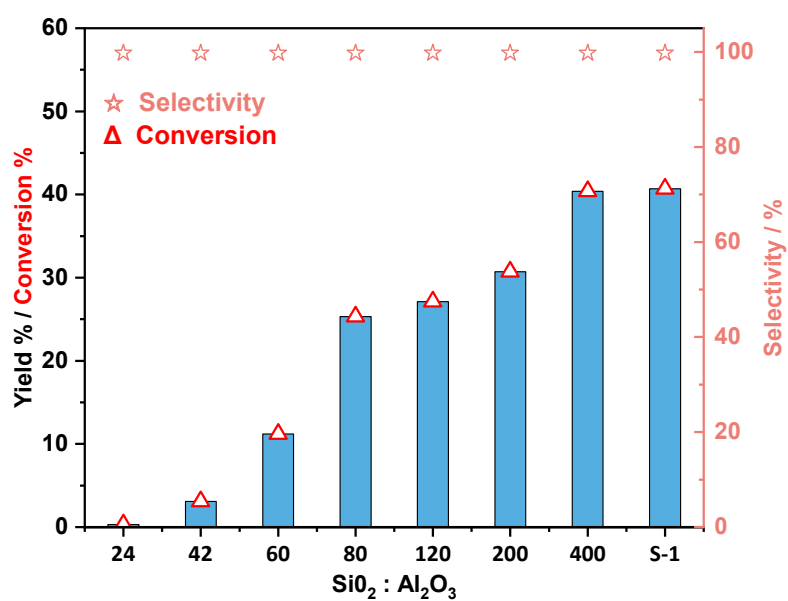

**Figure S1.** The results of glucose conversion over Li/ZSM-5 catalyst with different Si/Al ratios. Reaction conditions: 1 h, 1 MPa N<sub>2</sub>, 300 mg glucose, 300 mg catalyst, 30 mL H<sub>2</sub>O and 50 °C. The Li loading is 1 wt% in all experiments.

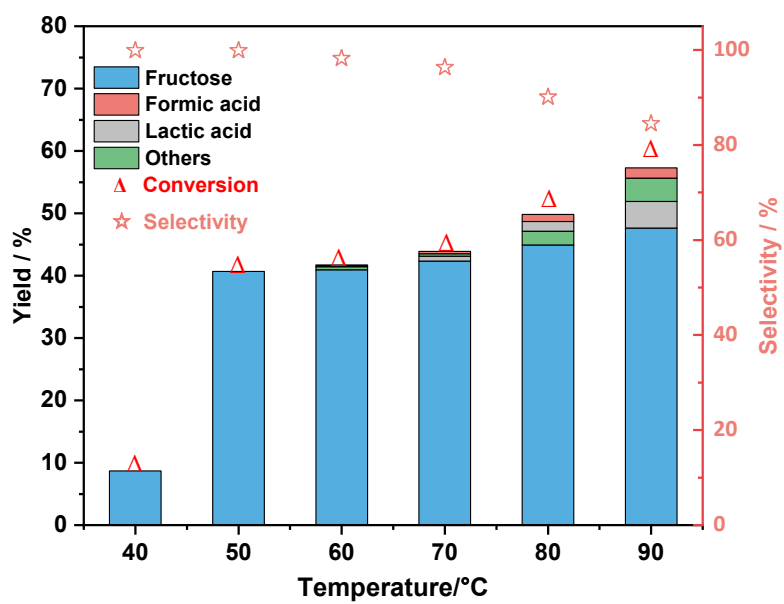

**Figure S2.** The results of glucose conversion over Li/S-1 catalyst at different temperature. Reaction conditions: 1 h, 1 MPa N<sub>2</sub>, 300 mg glucose, 300 mg catalyst, and 30 mL H<sub>2</sub>O. The Li loading is 1 wt% in all experiments.

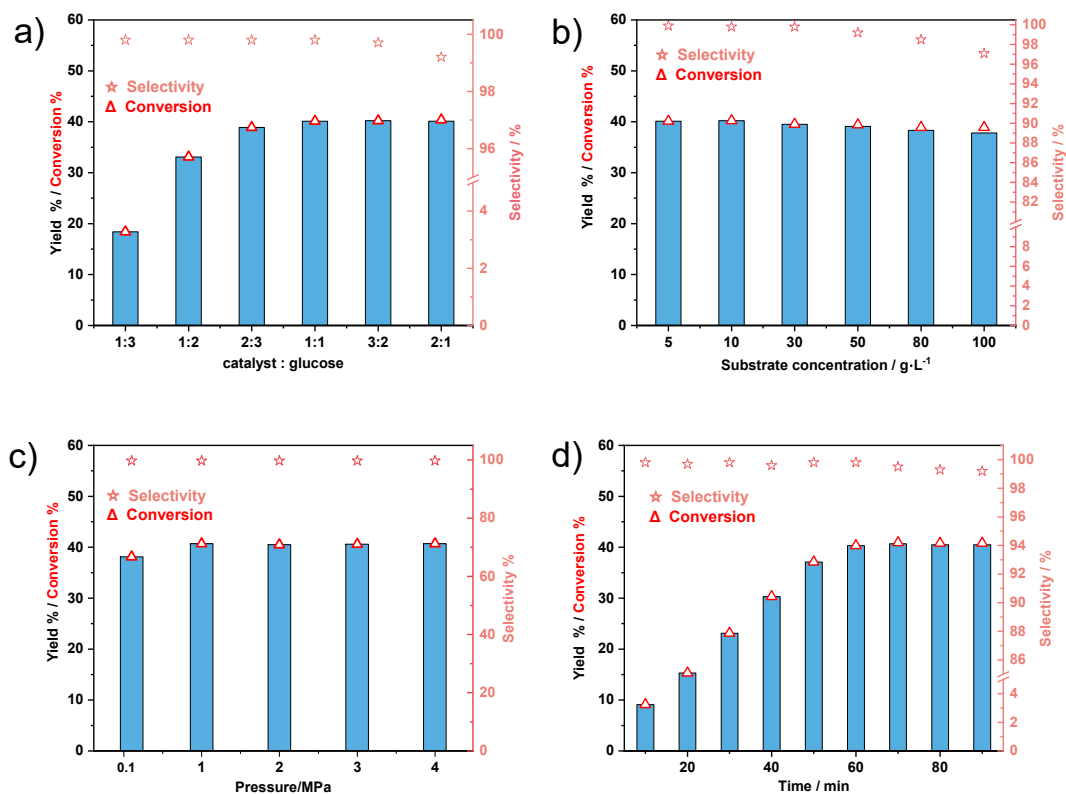

**Figure S3.** a) Different ratio of catalysts used in the conversion of glucose. b) Different concentration of glucose with the same ratio of catalyst/glucose in the conversion of glucose over Li/S-1 catalyst. c) The influence of pressure in the conversion of glucose over Li/S-1 catalyst. d) The reaction of glucose in water over Li/S-1 catalyst with the prolong time. Reaction condition: 1 h, 1 MPa N<sub>2</sub>, 300 mg glucose, 300 mg catalyst, 30 mL H<sub>2</sub>O and 50 °C. The Li loading is 1 wt% in all experiments.

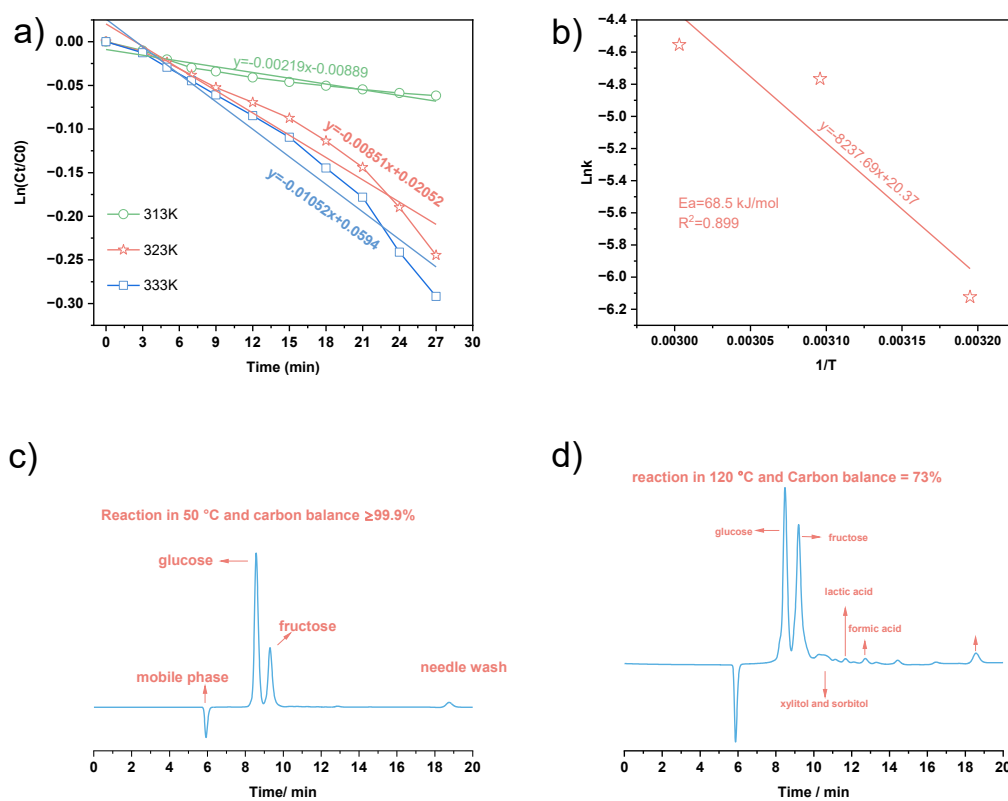

**Figure S4.** **a)** Reaction rate constants of glucose at different temperatures. **b,** Diagram of apparent activation energy of glucose over Li/S-1 catalyst. **c, d)** The HPLC results of glucose conversion over Li/S-1 catalyst in 50 and 100 °C. The Li loading is 1 wt% in all experiments.

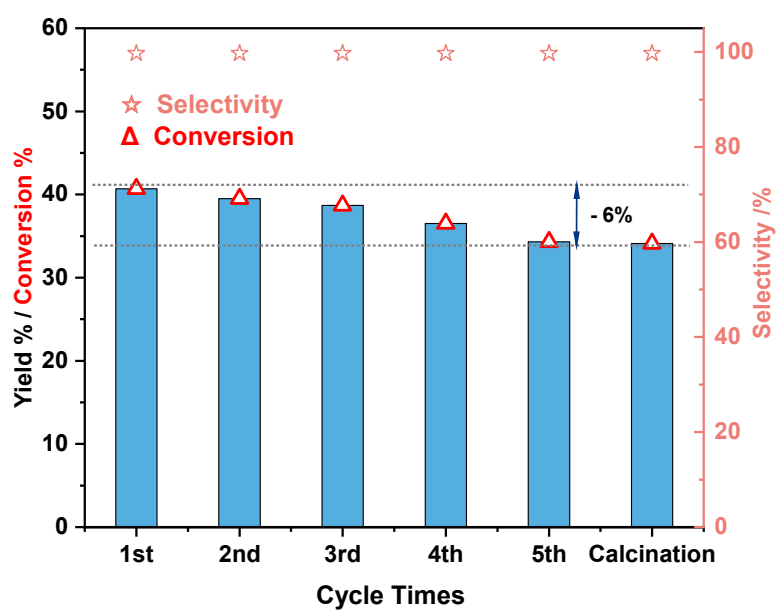

**Figure S5.** The results of glucose isomerization over Li/S-1 catalyst in 5 cycles. Reaction conditions: 1 h, 1 MPa N<sub>2</sub>, 300 mg glucose, 300 mg catalyst, 30 mL H<sub>2</sub>O and 50 °C. The Li loading is 1 wt% in all experiments.

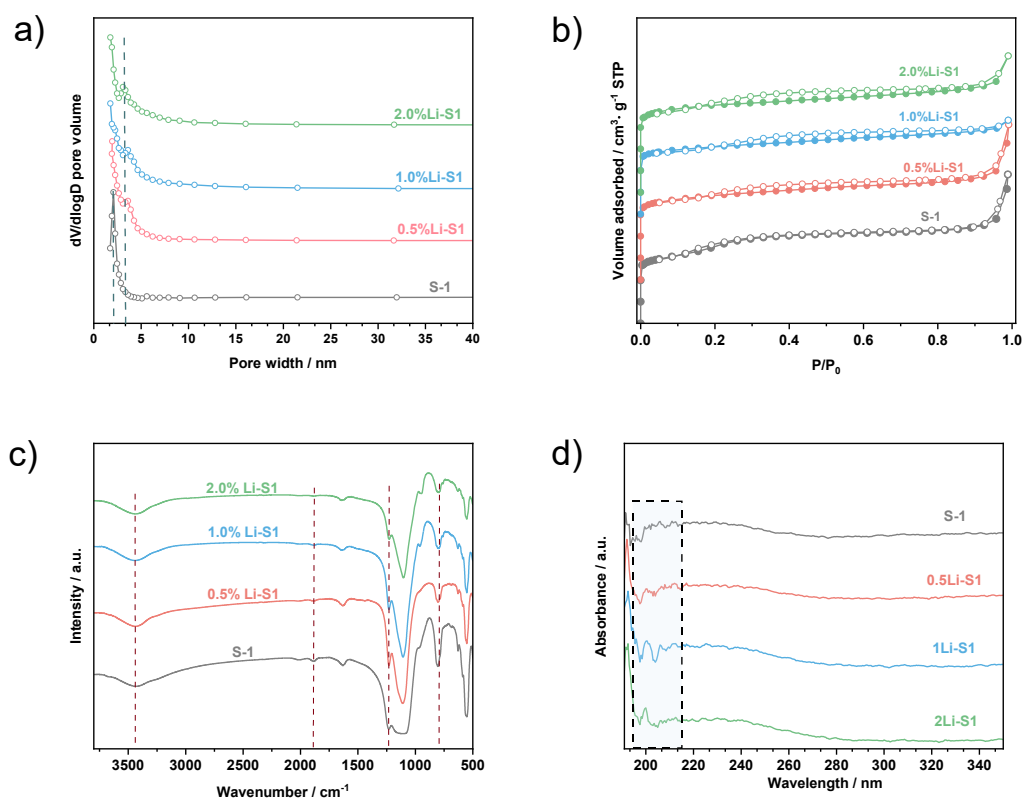

**Figure S6.** a) Pore size distribution and b) Hysteresis loop of Li/S-1 catalyst with different Li concentrations. c) FTIR spectra of Li/S-1 catalyst. d) UV-Vis of Li/S-1 catalyst

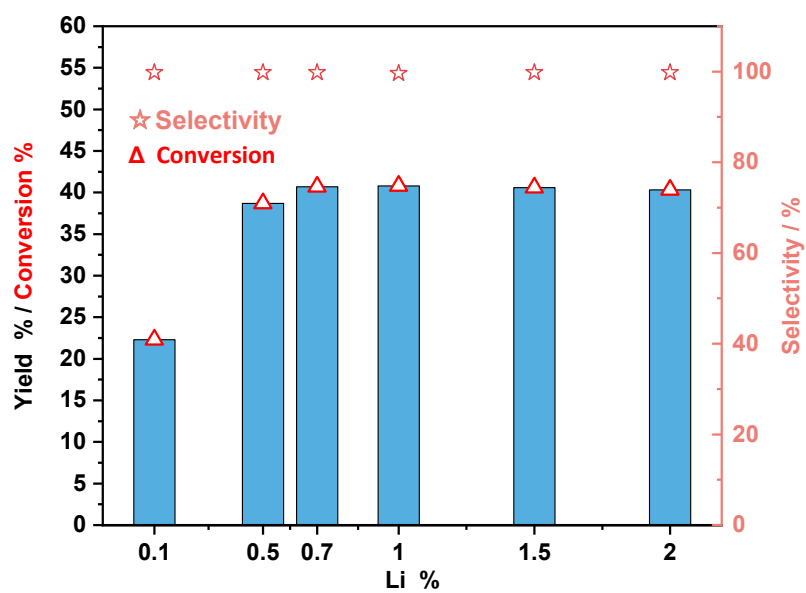

**Figure S7.** The results of glucose conversion over Li/S-1 catalyst with different Li concentrations. Reaction conditions: 1 h, 1 MPa N<sub>2</sub>, 300 mg glucose, 300 mg catalyst, 30 mL H<sub>2</sub>O and 50 °C.



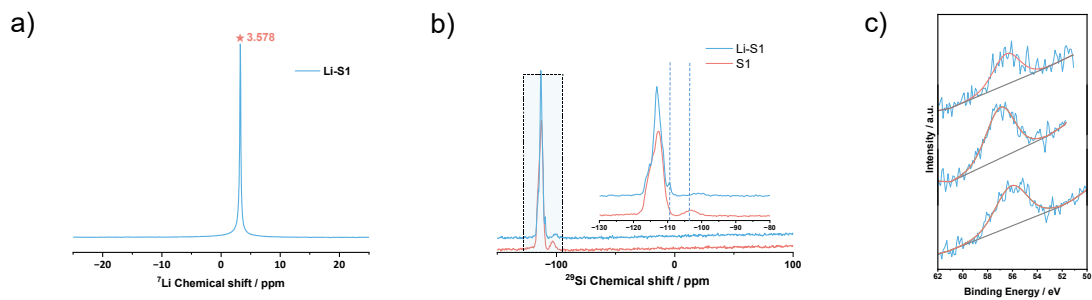

**Figure S8.** a)  ${}^7\text{Li}$  solid state NMR spectrum of Li/S-1 catalyst. b)  ${}^{29}\text{Si}$  solid state NMR spectrum of Li/S-1 catalyst. c) Li 1s XPS analysis of Li/S-1 catalyst with different Li concentrations.

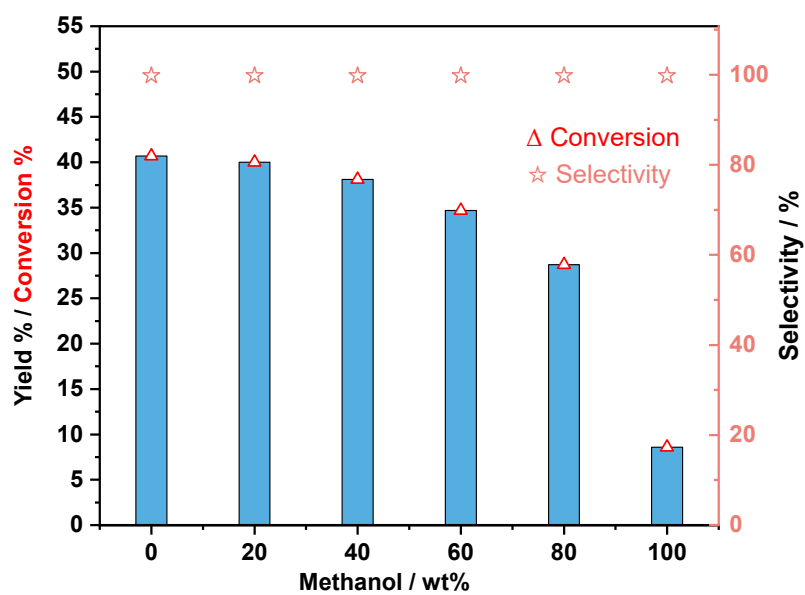

**Figure S9.** The results of glucose conversion over Li/S-1 catalyst with different ratio of methanol: water: Reaction conditions: 1 h, 1 MPa N<sub>2</sub>, 300 mg glucose, 300 mg catalyst, 30 mg solution and 50 °C. The Li loading is 1 wt% in all experiments.

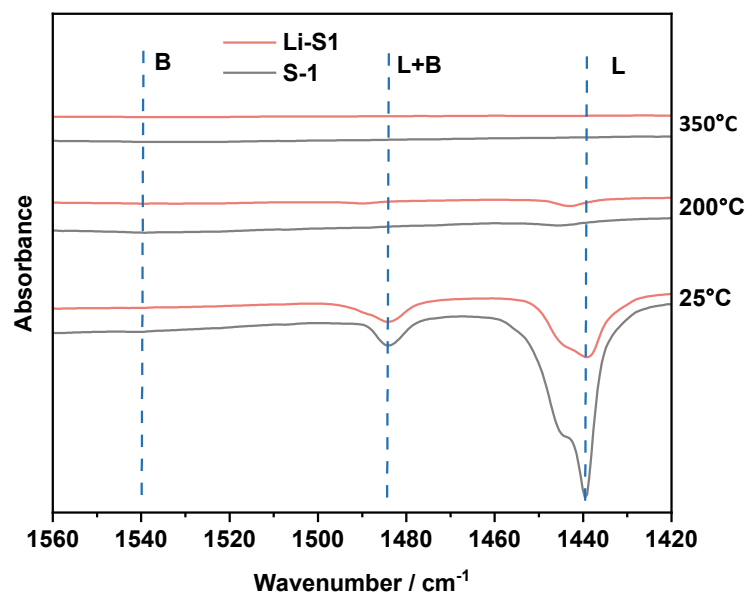

**Figure S10.** The Py-IR analysis of Li/S-1 catalyst.

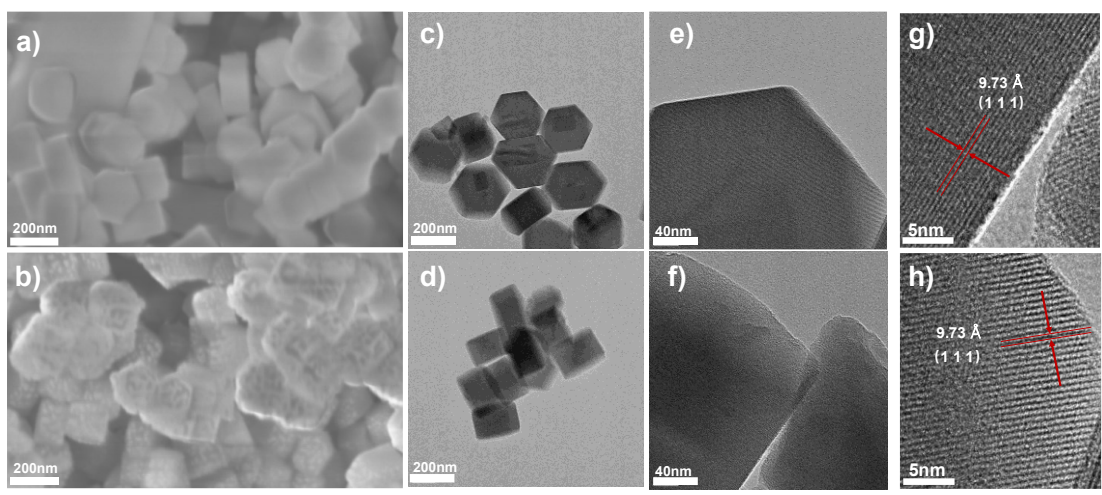

**Figure S11.** The SEM and TEM images of Li/S-1 catalyst and S-1 zeolite. S-1(a, c, e, g), Li-S1(b, d, f, h)

## Reference

1. A.I.M. Rabee; S.D. Le; S. Nishimura, *Chem-Asian J.*, 2020. 15, 294-300.
2. H. Kitajima; Y. Higashino; S. Matsuda; H. Zhong; M. Watanabe; T.M. Aida; R.L. Smith, Jr., *Catal. Today*, 2016. 274, 67-72.
3. Q. Yang; S. Zhou; T. Runge, *J. Catal.*, 2015. 330, 474-484.
4. S. Pham Anh; S. Nishimura; K. Ebitani, *Reac. Kinet. Mech. and Cat.*, 2014. 111, 183-197.
5. T. Witvrouw; J. Dijkmans; S. Paulussen; B. Sels, *J. Energy Chem.*, 2013. 22, 451-458.
6. S. Lima; A.S. Dias; Z. Lin; P. Brandao; P. Ferreira; M. Pillinger; J. Rocha; V. Calvino-Casilda; A.A. Valente, *Appl. Catal. A.*, 2008. 339, 21-27.
7. J. Lecomte; A. Finiels; C. Moreau, *Starch-Starke*, 2002, 54, 75-79.
8. I. Delidovich; R. Palkovits, *J. Catal.*, 2015, 327, 1-9.
9. R. Bermejo-Deval; R.S. Assary; E. Nikolla; M. Moliner; Y. Roman-Leshkov; S.J. Hwang; A. Palsdottir; D. Silverman; R.F. Lobo; L.A. Curtiss; M.E. Davis, *Proc. Natl. Acad. Sci. U.S.A.*, 2012, 109, 9727-32.
10. I. Graca; D. Iruretagoyena; D. Chadwick, *Appl. Catal. B.*, 2017, 206, 434-443.
11. P.Y. Dapsens; C. Mondelli; J. Jagielski; R. Hauert; J. Perez-Ramirez, *Catal. Sci. Tech.*, 2014, 4, 2302-2311.
12. X. Ye; X. Shi; J. Li; B. Jin; J. Cheng; Z. Ren; H. Zhong; L. Chen; X. Liu; F. Jin; T. Wang, *Chem. Eng. J.*, 2022, 440.
13. M.L.U. Rehman; Q. Hou; X. Bai; Y. Nie; H. Qian; T. Xia; R. Lai; G. Yu; M. Ju, *ACS Sustain. Chem. Eng.*, 2022. 10, 1986-1993.
14. AK. Kar; R. Srivastava, *ChemCatChem*, 2022. 14. 1867-3899.
15. J. Ren; X. Ye; X. Shi; H. Xu; L. Wu; T. Wang, *React. Chem. Eng.*, 2022. 7, 1786-1796.
16. J. Liu; L. Yang; E. Shuang; C. Jin; C. Gong; K. Sheng; X. Zhang, *Fuel*, 2022. 315. 123172.
